# Supplementary material for: Cancer-derived exosomal miR-25-3p promotes pre-metastatic niche formation by inducing vascular permeability and angiogenesis
Source: PubMed Central journal article supplement (PMC6300604; doi:10.1038/s41467-018-07810-w), 2018-12-19
Supplement: 41467_2018_7810_MOESM1_ESM.pdf [file 41467_2018_7810_MOESM1_ESM.pdf]

**Cancer-derived Exosomal MiR-25-3p Promotes Pre-metastatic Niche  
Formation by Inducing Vascular Permeability and Angiogenesis**  
Zeng et al.

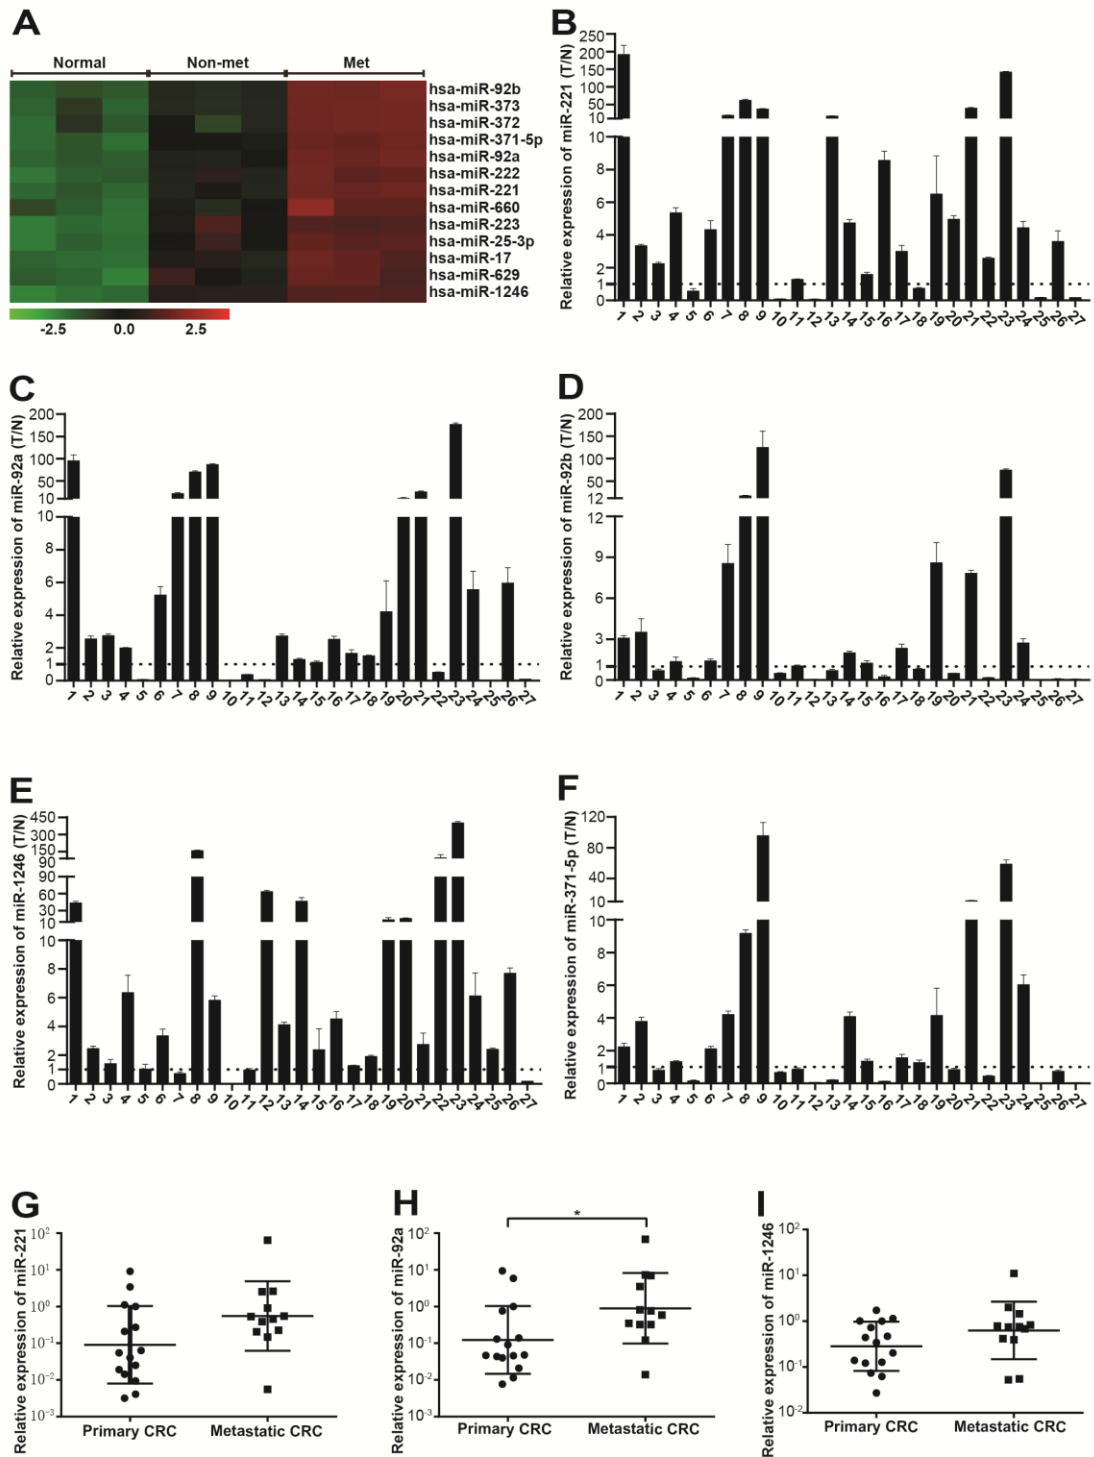

**Supplementary Figure 1.** MiR-25-3p is a metastasis-associated miRNA in CRC. **(A)** A heatmap representing microarray data for the indicated CRC tissues with and without metastasis and corresponding normal mucosa. Five clinical samples were pooled in each group. **(B-F)** RT-PCR analysis of

miR-221 (B), miR-92a (C), miR-92b (D), miR-1246 (E) and miR-371-5p (F) expression in 27 paired fresh CRC tissues and matched adjacent normal mucosa. The expression of miRNAs in normal mucosa was normalized to 1. Mean  $\pm$  s.e.m are provided (n=3). **(G-I)** RT-PCR analysis of miR-221 (G), miR-92a (H) and miR-1246 (I) expression in 27 cases of the primary CRC tissues with or without metastasis (17 cases without metastasis, 10 cases with metastasis). Mean  $\pm$  s.e.m are provided. \*P <.05 according to two-tailed Student's t test.

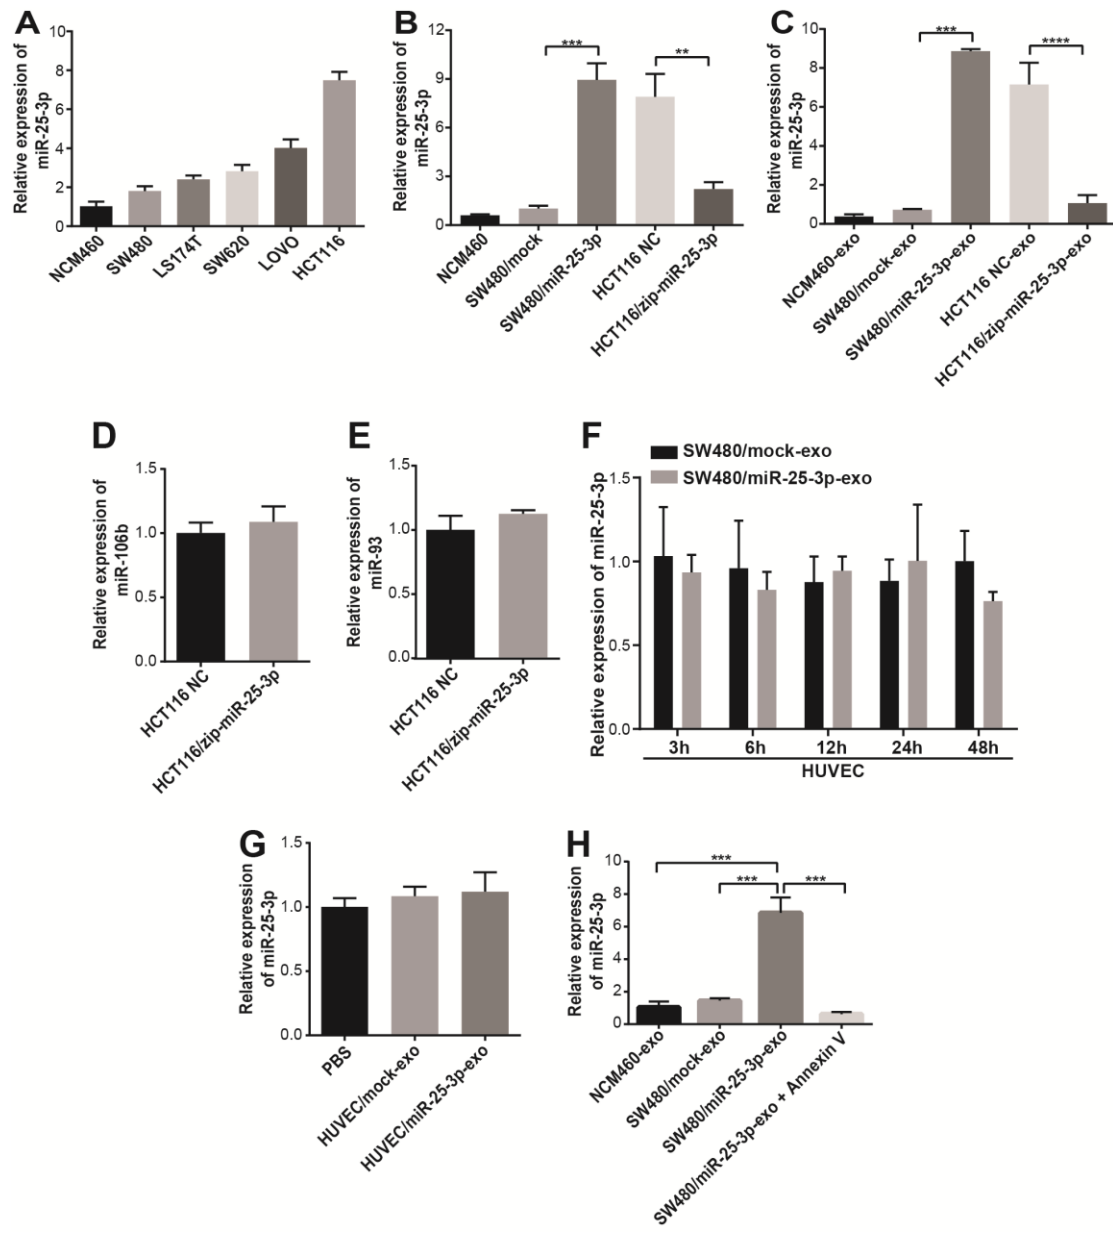

**Supplementary Figure 2.** CRC-secreted miR-25-3p can be transferred to HUVECs. **(A)** RT-PCR analysis of miR-25 expression in NCM460, SW480, LS174T, SW620, LOVO and HCT116 cell lines. Mean  $\pm$  s.e.m are provided (n=3). **(B)** RT-PCR analysis of miR-25-3p expression in NCM460, SW480/mock, SW480/miR-25-3p, HCT116 NC and HCT116/zip-miR-25-3p. Mean  $\pm$  s.e.m are provided (n=3). **(C)** RT-PCR analysis of miR-25-3p

expression in exosomes derived from NCM460, SW480/mock, SW480/miR-25-3p, HCT116 NC and HCT116/zip-miR-25-3p. Mean  $\pm$  s.e.m are provided (n=3). **(D)** RT-PCR analysis of miR-106b expression in HUVEC NC and HUVEC/zip-miR-25-3p. Mean  $\pm$  s.e.m are provided (n=3). **(E)** RT-PCR analysis of miR-93 expression in HUVEC NC and HUVEC/zip-miR-25-3p. Mean  $\pm$  s.e.m are provided (n=3). **(F)** RT-PCR analysis of pri-miR-25-3p expression in HUVECs incubated with exosomes derived from SW480/mock and SW480/miR-25-3p for 3 h, 6 h, 12 h, 24 h and 48 h. Mean  $\pm$  s.e.m are provided (n=3). **(G)** Effect of PBS, HUVEC/mock exosomes, HUVEC/miR-25-3p exosomes treatments on miR-25-3p expression in SW480. Mean  $\pm$  s.e.m are provided (n=3). **(H)** Effect of NCM460 exosomes, SW480/mock exosomes, SW480/miR-25-3p exosomes, SW480/miR-25-3p exosomes + Annexin V treatments on miR-25-3p expression in HUVECs. Mean  $\pm$  s.e.m are provided (n=3). \*\*P<.01, \*\*\*P<.001, \*\*\*\*P<.0001 according to two-tailed Student's t test.

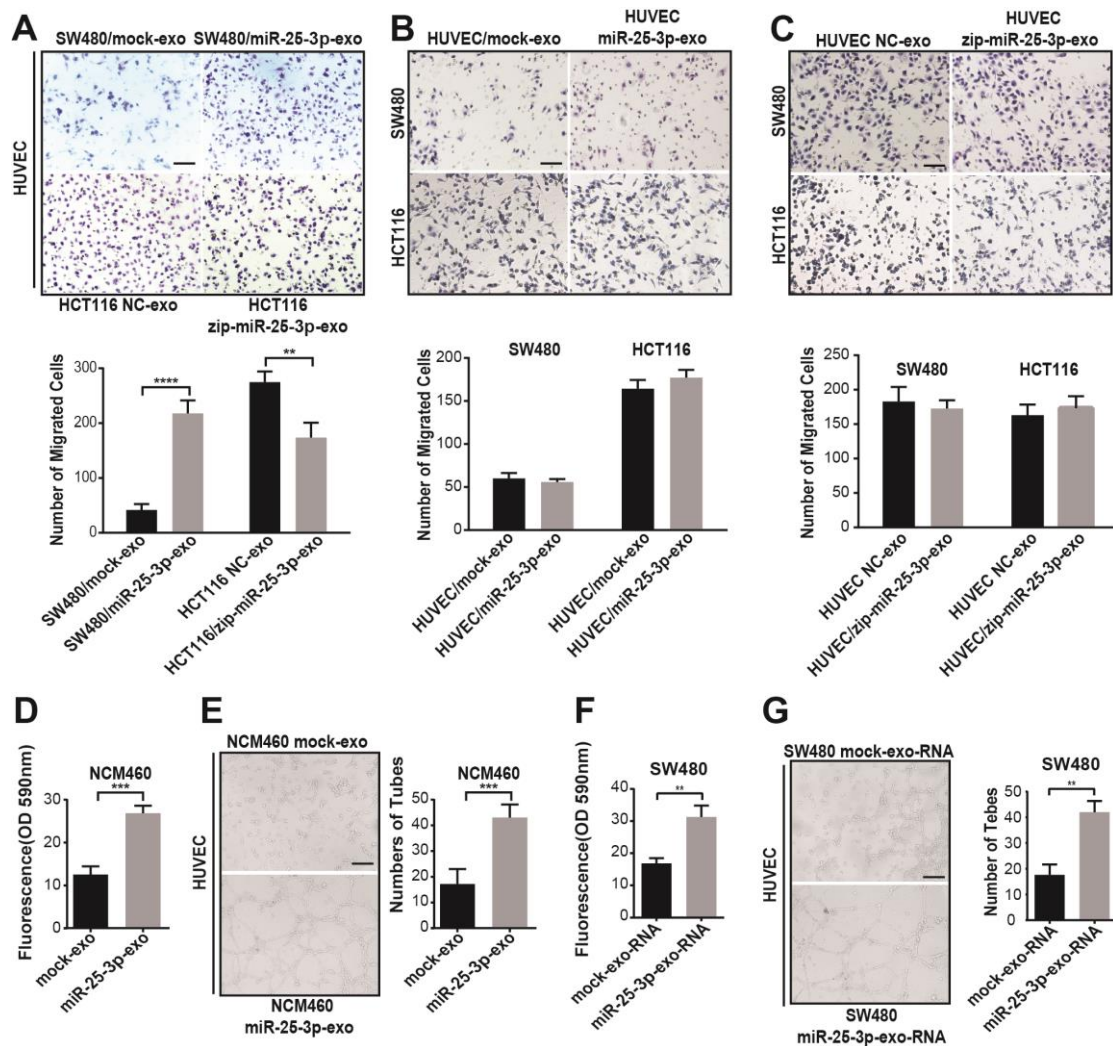

**Supplementary Figure 3.** MiR-25-3p promoted vascular permeability and angiogenesis. **(A)** Effect of SW480/mock exosomes, SW480/miR-25-3p exosomes, HCT116 NC exosomes and HCT116/miR-25-3p exosomes treatment on migration of HUVECs. Scale bar represents 100  $\mu$ m. Mean  $\pm$  s.e.m are provided (n=4). **(B)** Effect of HUVEC/mock exosomes and HUVEC/miR-25-3p exosomes treatment on migration of SW480 and HCT116. Scale bar represents 100  $\mu$ m. Mean  $\pm$  s.e.m are provided (n=4). **(C)** Effect of HUVEC NC exosomes and HUVEC/zip-miR-25-3p exosomes treatment on

migration of SW480 and HCT116. Scale bar represents 100  $\mu\text{m}$ . Mean  $\pm$  s.e.m are provided (n=4). **(D)** Permeability of the HUVEC monolayers to rhodamine-dextran (70 kDa) after exposure to exosomes derived from NCM460/mock, NCM460/miR-25-3p, for 72h. Mean  $\pm$  s.e.m are provided (n = 3). **(E)** Effect of exosomes derived from NCM460/mock, NCM460/miR-25-3p on tube formation ability of HUVECs by tube formation assay. Mean  $\pm$  s.e.m are provided (n = 3). Scale bar represents 100  $\mu\text{m}$ . **(F)** Effect of transfecting RNA extracted from SW480/mock exosomes, SW480/miR-25-3p exosomes on permeability of HUVEC monolayers by in vitro permeability assay. Mean  $\pm$  s.e.m are provided (n = 3). **(G)** Effect of transfecting RNA extracted from SW480/mock exosomes, SW480/miR-25-3p exosomes on tube formation ability of HUVECs by tube formation assay. Mean  $\pm$  s.e.m are provided (n = 3). Scale bar represents 100  $\mu\text{m}$ . \*\*P<.01, \*\*\*P<.001, \*\*\*\*P<.0001 according to two-tailed Student's t test.

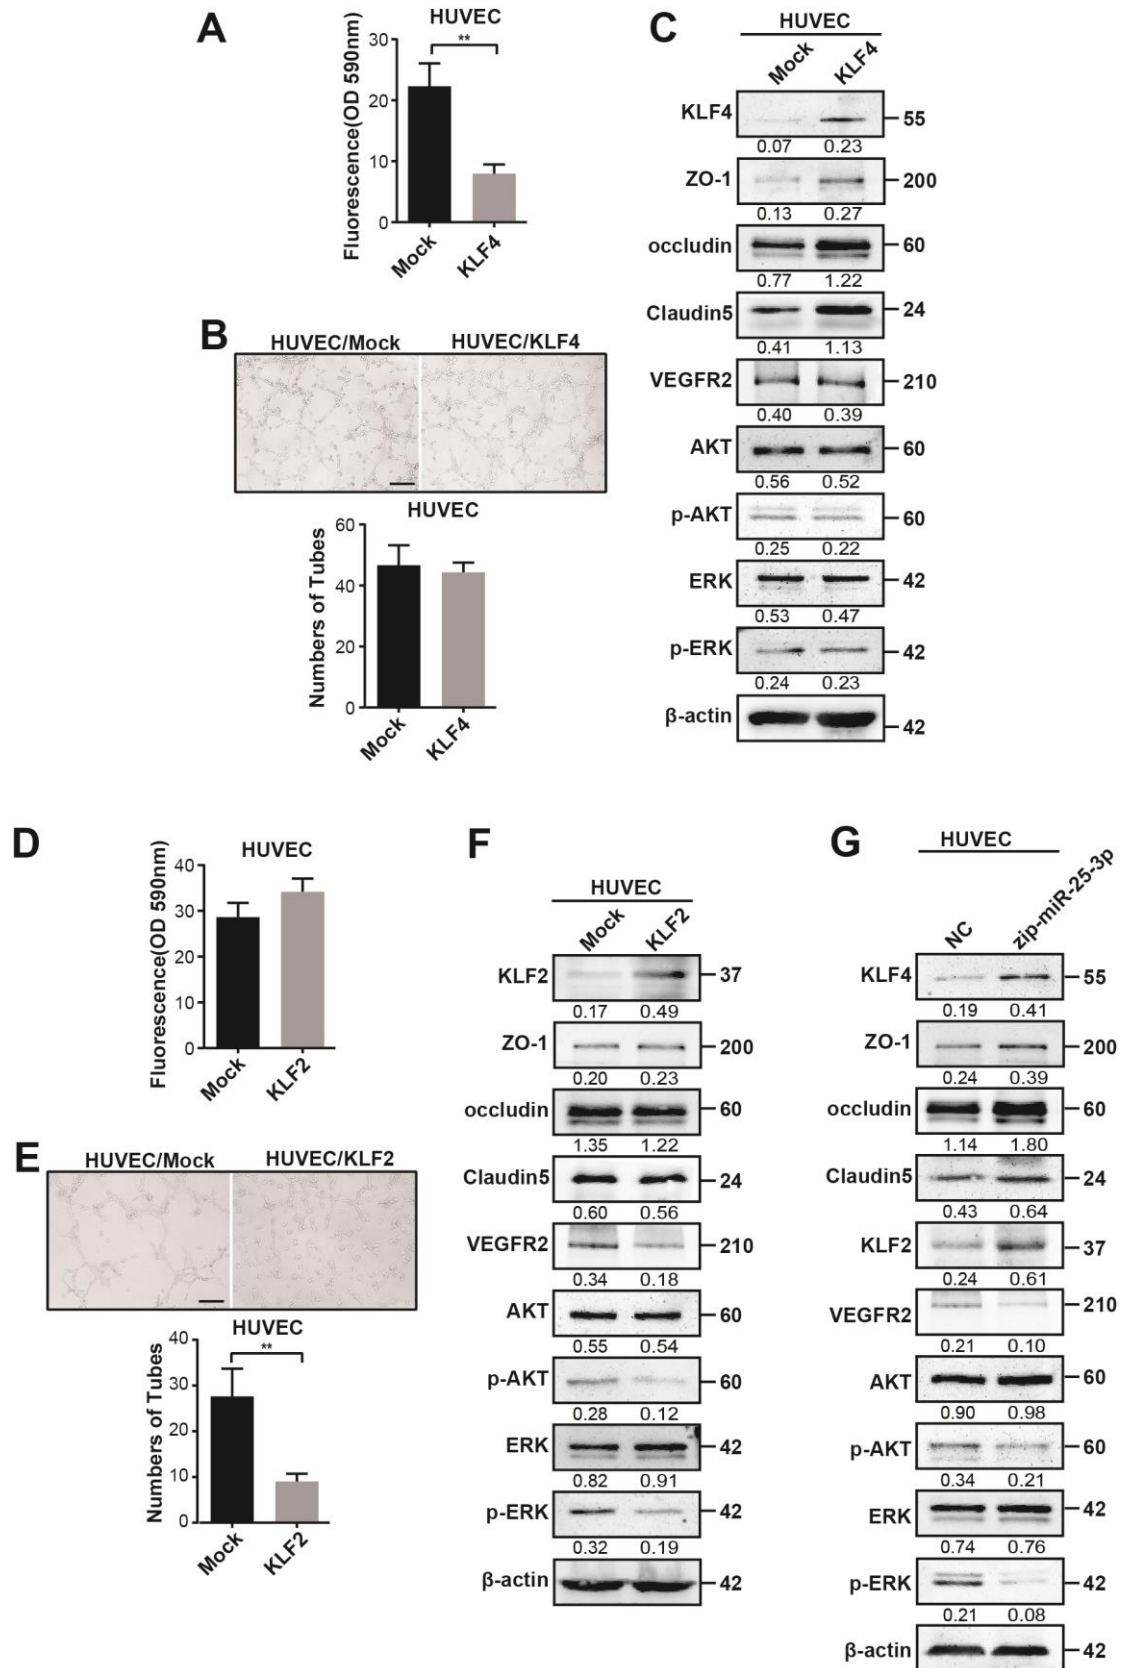

**Supplementary Figure 4.** The role of KLF2, KLF4 and miR-25-3p in HUVECs.



**(A)** Effect of KLF4 over-expression on permeability of HUVEC monolayers by in vitro permeability assay. Mean  $\pm$  s.e.m are provided (n = 3). **(B)** Effect of KLF4 over-expression on tube formation ability of HUVECs by tube formation assay. Mean  $\pm$  s.e.m are provided (n = 3). Scale bar represents 100  $\mu$ m. **(C)** KLF4, ZO-1, occludin, claudin 5, VEGFR2, AKT, p-AKT, ERK and p-ERK expression in HUVEC/mock and HUVEC/KLF4 by Western blot. **(D)** Effect of KLF2 over-expression on permeability of HUVEC monolayers by in vitro permeability assay. Mean  $\pm$  s.e.m are provided (n = 3). **(E)** Effect of KLF2 over-expression on tube formation ability of HUVECs by tube formation assay. Mean  $\pm$  s.e.m are provided (n = 3). Scale bar represents 100  $\mu$ m. **(F)** KLF2, ZO-1, occludin, claudin 5, VEGFR2, AKT, p-AKT, ERK and p-ERK expression in HUVEC/mock and HUVEC/KLF2 by Western blot. **(G)** KLF4, ZO-1, occludin, claudin 5, KLF2, VEGFR2, AKT, p-AKT, ERK and p-ERK expression in HUVEC NC and HUVEC/zip-miR-25-3p by Western blot. \*\*P<.01 according to two-tailed Student's t test.

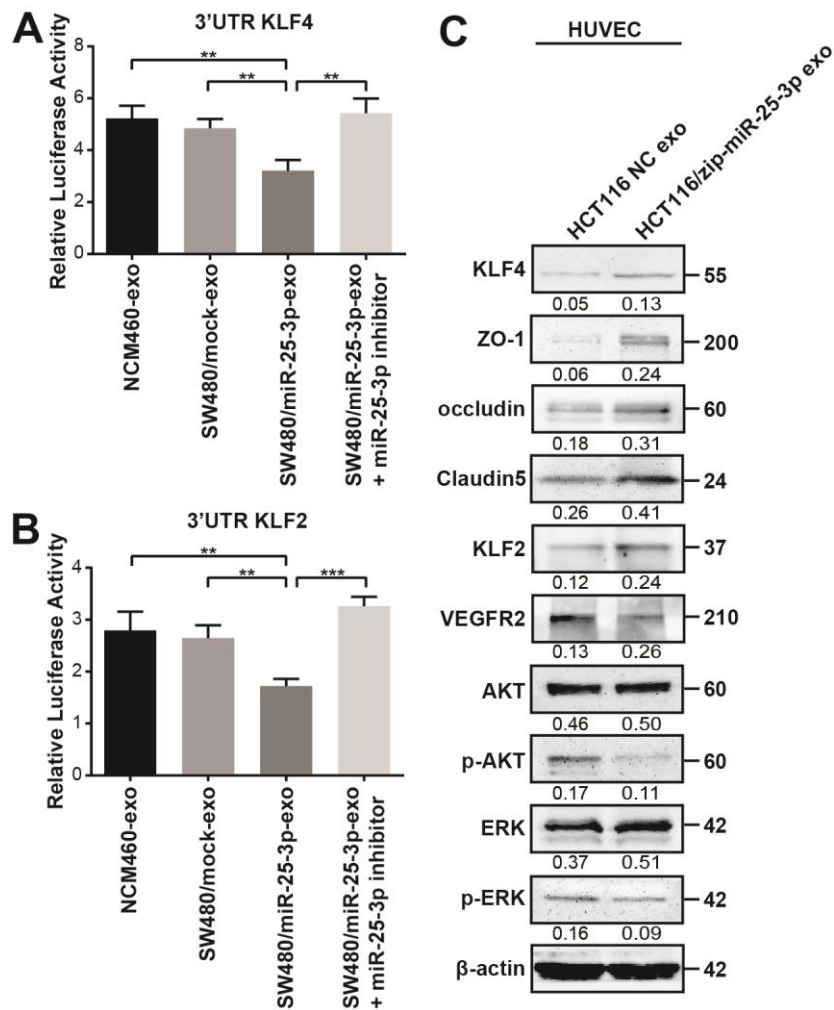

**Supplementary Figure 5.** Exosomal miR-25-3p hampered KLF2 and KLF4 expression. **(A and B)** Luciferase activities of 3'UTR KLF4-luc (A) and 3'UTR KLF2-luc (B) constructs in HUVECs after adding NCM460 exosomes, SW480/mock exosomes, SW480/miR-25-3p exosomes and SW480/miR-25-3p exosomes + miR-25-3p inhibitor. Mean  $\pm$  s.e.m are provided (n = 3). **(C)** KLF4, ZO-1, occludin, claudin 5, KLF2, VEGFR2, AKT, p-AKT, ERK and p-ERK expression in HUVECs incubated with HCT116 NC exosomes and HCT116/zip-miR-25-3p exosomes by Western blot. \*\*P<.01, \*\*\*P<.001 according to two-tailed Student's t test.

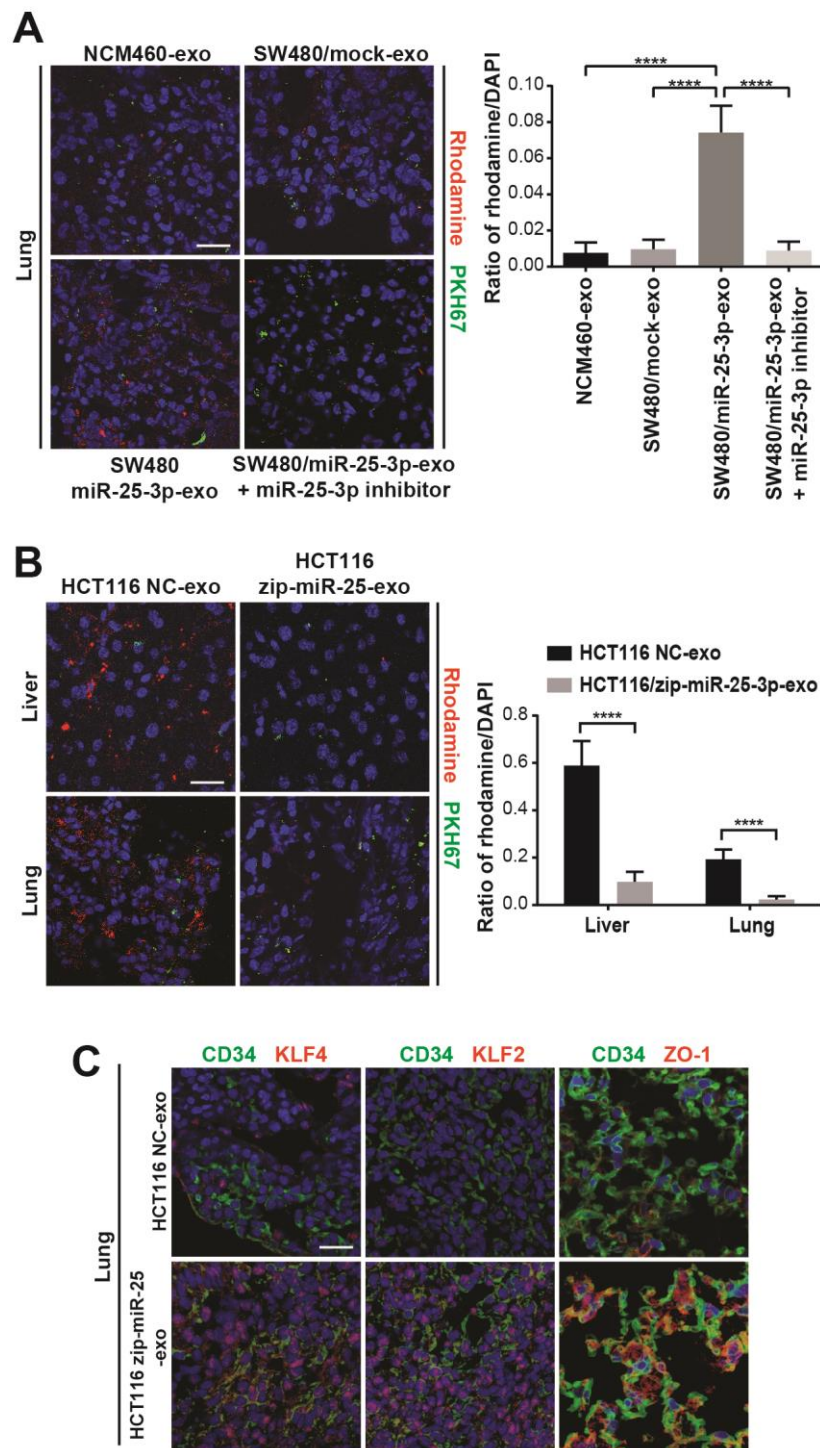

**Supplementary Figure 6.** CRC-secreted miR-25-3p primes vascular permeability in vivo. **(A)** Effect of NCM460 exosomes, SW480/mock exosomes, SW480/miR-25-3p exosomes, SW480/miR-25-3p exosomes + miR-25-3p inhibitor treatments on vascular permeability of mice lung by in vivo

permeability assay. The mice were injected with rhodamine-dextran after exposure to PKH67-labeled exosomes. Levels of rhodamine-dextran fluorescence in tissues were quantified using Image J software and normalized to the levels of DAPI. Mean  $\pm$  s.e.m are provided (n = 5). Scale bar represents 50  $\mu$ m. Scale bar represents 50  $\mu$ m. **(B)** Effect of HCT116 NC exosomes and HCT116/zip-miR-25-3p exosomes on vascular permeability of mice liver and lung by in vivo permeability assay. The mice were injected with rhodamine-dextran after exposure to PKH67-labeled exosomes. Levels of rhodamine-dextran fluorescence in tissues were quantified using Image J software and normalized to the levels of DAPI. Mean  $\pm$  s.e.m are provided (n = 5). Scale bar represents 50  $\mu$ m. Scale bar represents 50  $\mu$ m. **(C)** Effect of HCT116 NC exosomes and HCT116/zip-miR-25-3p exosomes treatments on vascular KLF4, KLF2 and ZO-1 expression (red) of mice lung by immunofluorescence. The vascular structures were labeled by CD34 (green). Scale bar represents 50  $\mu$ m. \*\*\*\*P <.0001 according to two-tailed Student's t test.

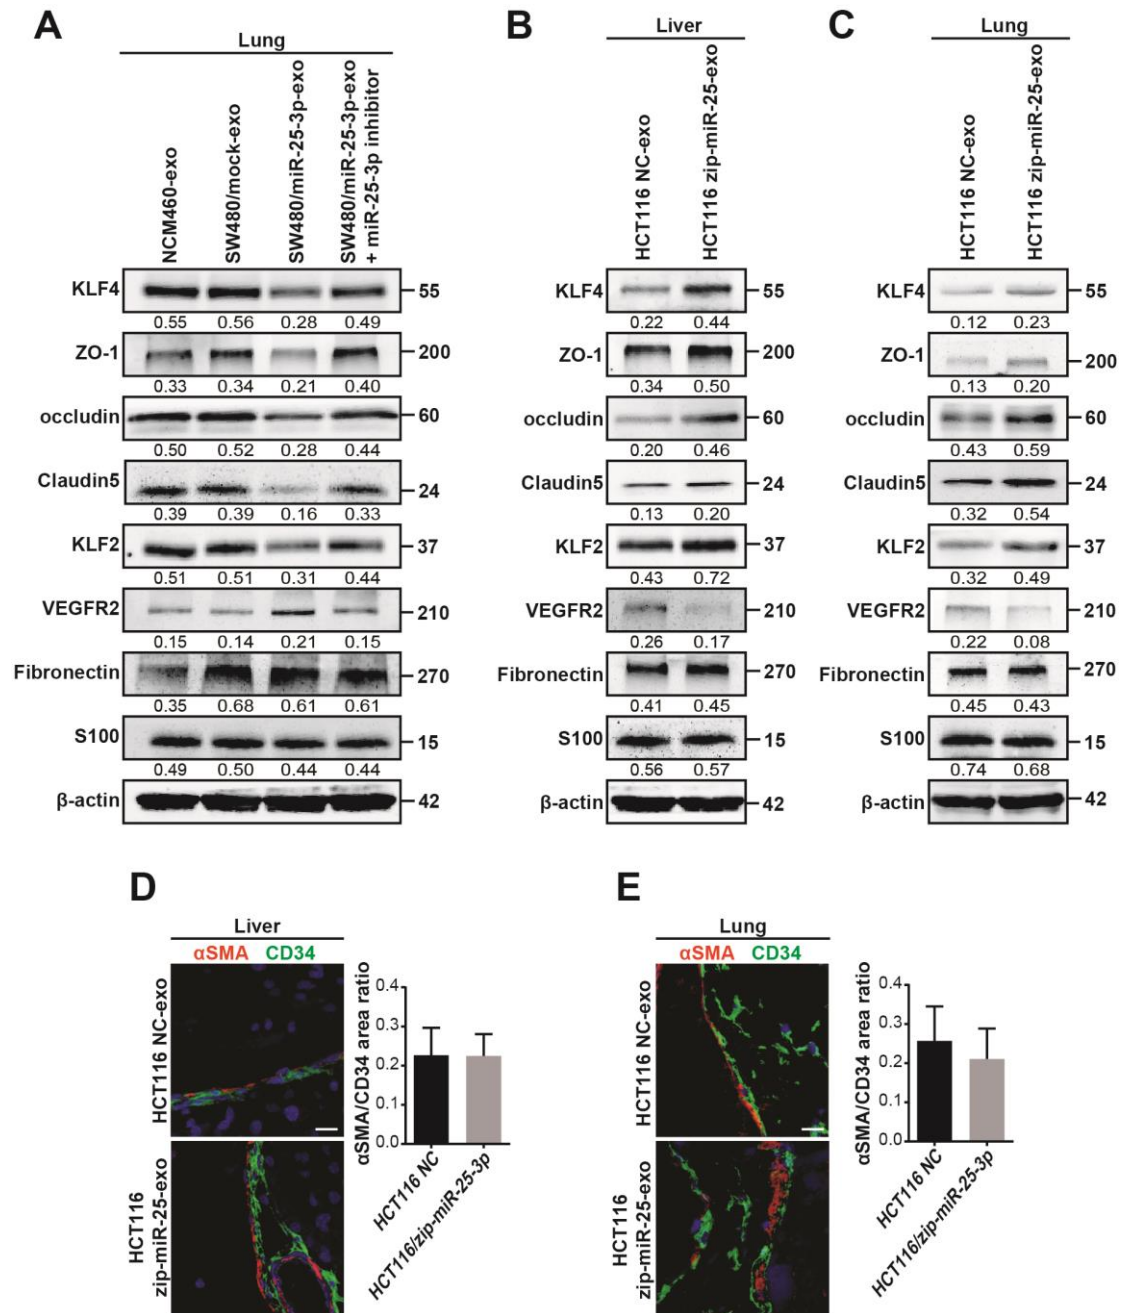

**Supplementary Figure 7.** The role of CRC-secreted miR-25-3p in vivo. **(A)** Effect of NCM460 exosomes, SW480/mock exosomes, SW480/miR-25-3p exosomes or SW480/miR-25-3p exosomes + miR-25-3p inhibitor treatments on KLF4, ZO-1, occludin, Claudin5, KLF2, VEGFR2, Fibronectin and S100 expression in mice lung by Western blot. **(B and C)** Effect of HCT116 NC exosomes and HCT116/zip-miR-25-3p exosomes treatments on KLF4, ZO-1,

occludin, Claudin5, KLF2, VEGFR2, Fibronectin and S100 expression in mice liver (B) and lung (C) by Western blot. **(D and E)** Effect of HCT116 NC exosomes and HCT116/zip-miR-25-3p exosomes treatments on pericyte coverage in mice liver (D) and lung (E). Pericyte coverage was quantified using Image J to measure the percentage area of  $\alpha$ SMA+ pericytes (red) versus CD31+ vessels (green). Mean  $\pm$  s.e.m are provided (n = 5). Scale bar represents 50  $\mu$ m.



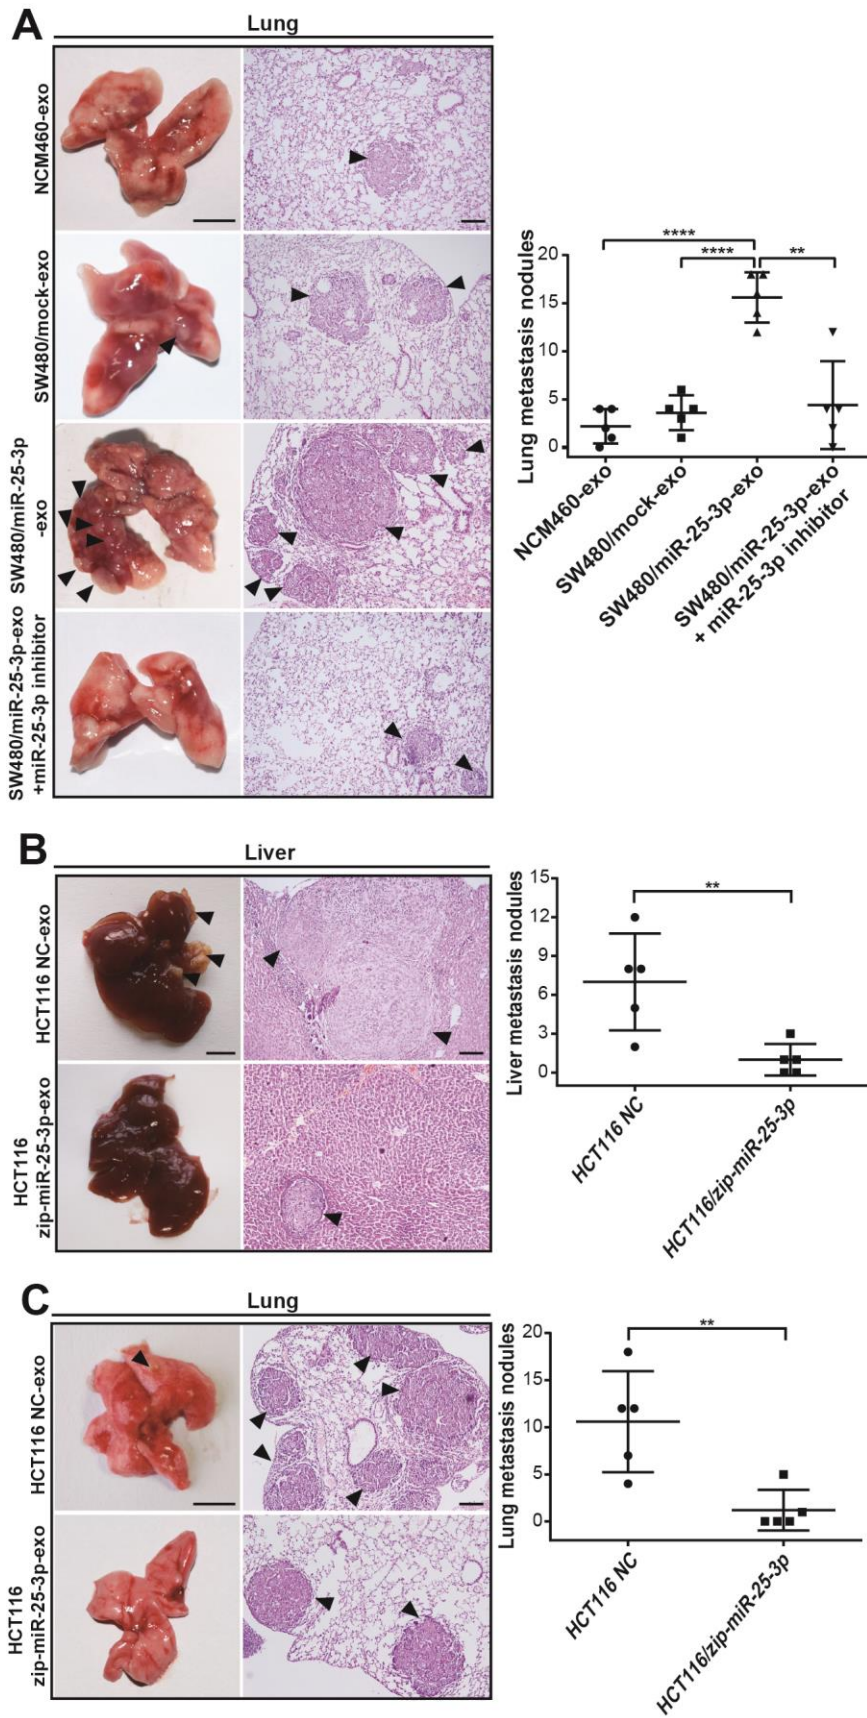

**Supplementary Figure 8. CRC-secreted miR-25-3p promotes CRC**

metastasis. **(A)** The mice were injected with naked SW480 cells via tail vein after exposure to NCM460 exosomes, SW480/mock exosomes, SW480/miR-25-3p exosomes or SW480/miR-25-3p exosomes + miR-25-3p inhibitor treatments. The number of lung metastatic sites (indicated by arrows) was counted under the microscope. Mean  $\pm$  s.e.m are provided (n = 5). Scale bar in left panels represents 0.5 cm. Scale bar in right panel represents 100  $\mu$ m. **(B and C)** The mice were injected with naked SW480 cells via tail vein or spleen after exposure to HCT116 NC exosomes and HCT116/zip-miR-25-3p exosomes treatments. The number of liver (B) and lung (C) metastatic sites (indicated by arrows) was counted under the microscope. Mean  $\pm$  s.e.m are provided (n = 5). Scale bar in left panels represents 0.5 cm. Scale bar in right panel represents 100  $\mu$ m. \*\*P < .01, \*\*\*\*P < .0001 according to two-tailed Student's t test.



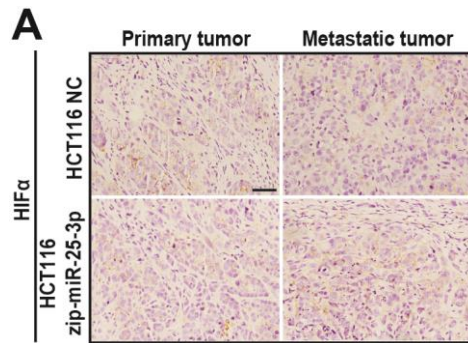

**Supplementary Figure 9.** MiR-25-3p has no effect on HIF $\alpha$  expression in CRC. **(A)** Effect of miR-25-3p knockdown on HIF $\alpha$  expression in primary and metastatic tumor. Scale bar represents 50  $\mu$ m.

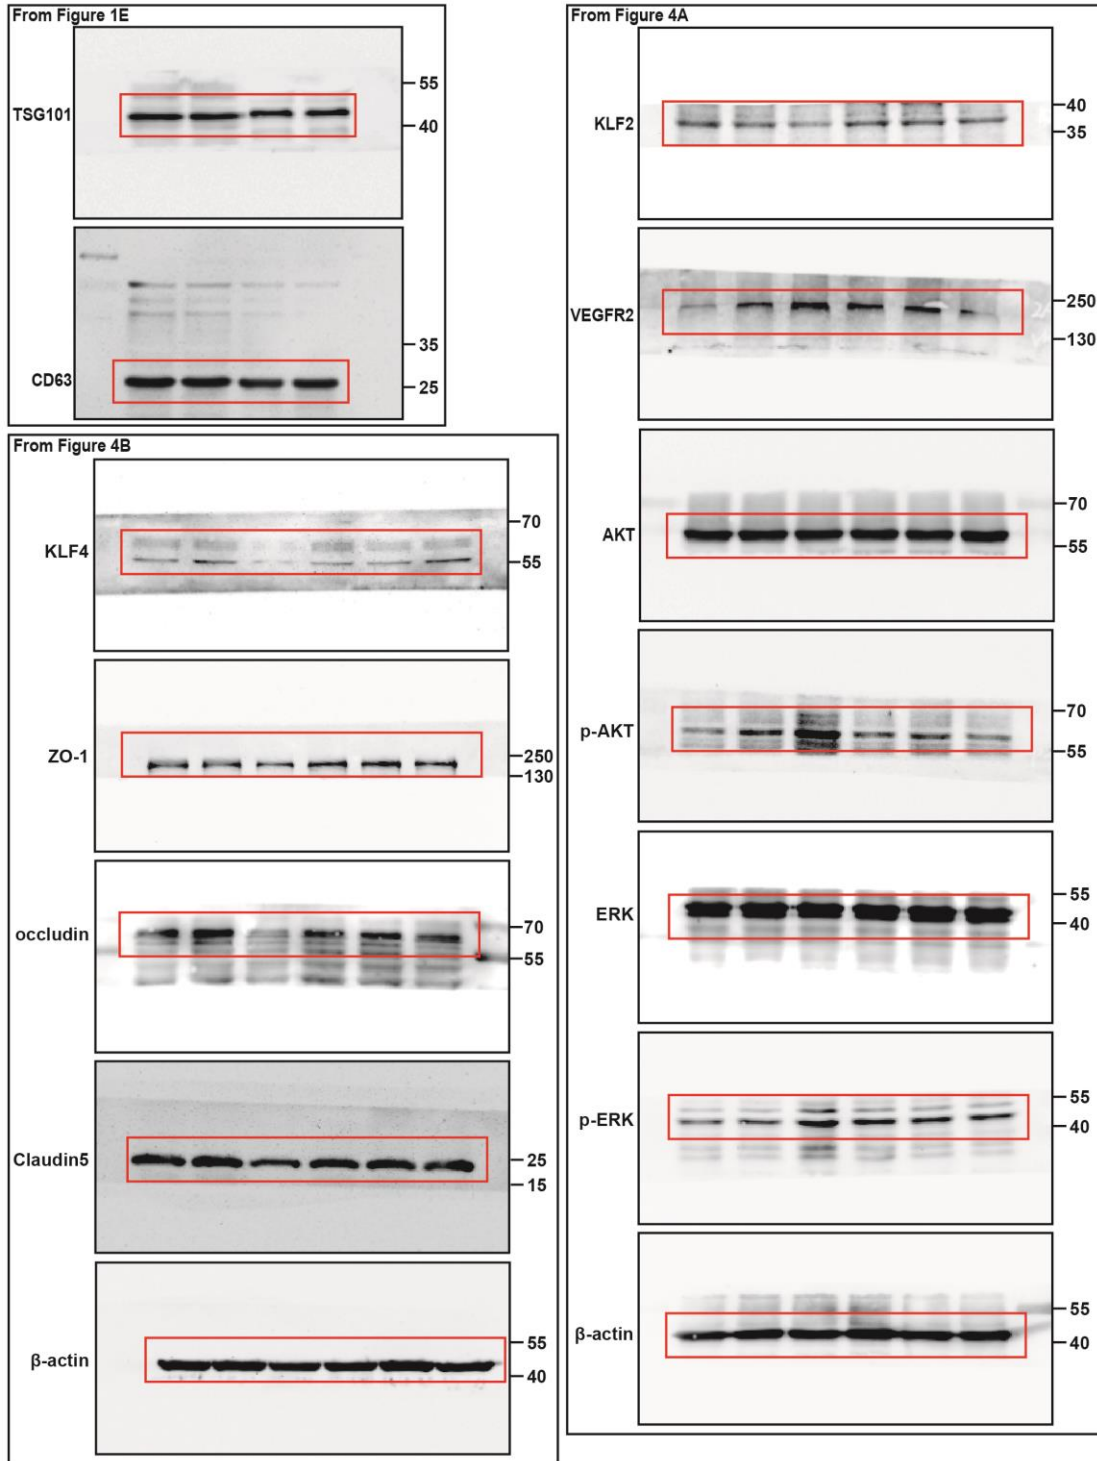

**Supplementary Figure 10. Uncropped western blots from main figures.** Shown are uncropped blots from figure 1E, 4A and 4B. The cropped region is highlighted with the red boxes.

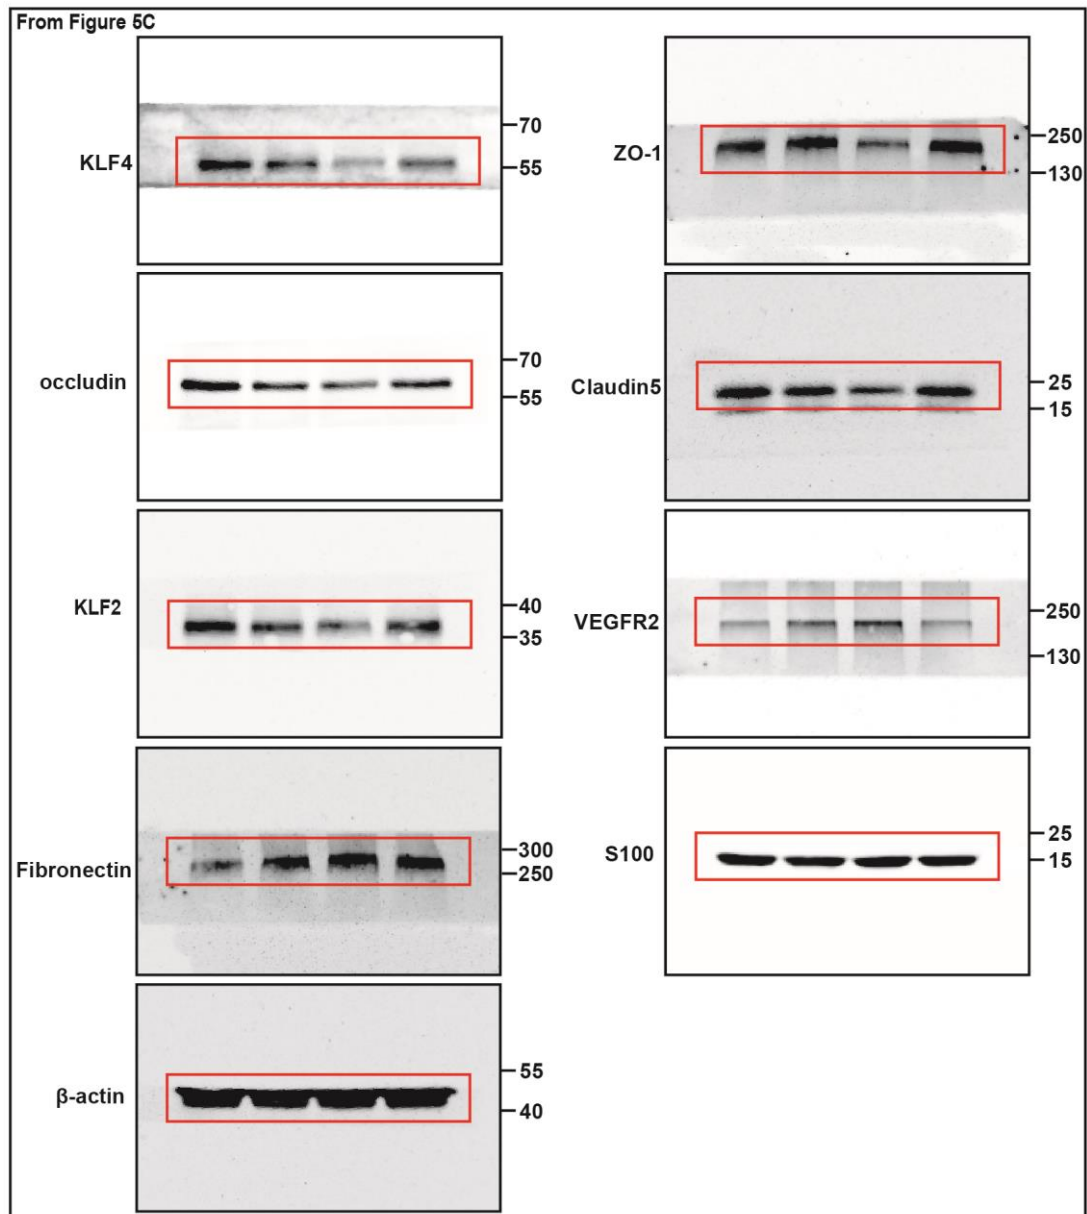

**Supplementary Figure 11. Uncropped western blots from main figures.** Shown are uncropped blots from figure 5C. The cropped region is highlighted with the red boxes.

**Supplementary Table 1.** Sequences of synthetic miRNA mimics.

| <b>Primer</b>        | <b>Sequence(5'→3')</b> |
|----------------------|------------------------|
| miR-25-3p sense      | CAUUGCACUUGUCUCGGUCUGA |
| miR-25-3p anti-sence | AGACCGAGACAAGUGCAAUGUU |
| mimics-nc sense      | UUCUCCGAACGUGUCACGUTT  |
| mimics-nc anti-sense | ACGUGACACGUUCGGAGAATT  |

**Supplementary Table 2.** Sequences of synthetic miRNA inhibitor.

| <b>Primer</b> | <b>Sequence(5'→3')</b> |
|---------------|------------------------|
| miR-25-3p     | UCAGACCGAGACAAGUGCAAUG |
| Inhibitor-nc  | CAGUACUUUUGUGUAGUACAA  |

**Supplementary Table 3.** Primer sequences for qPCR.

| <b>Primer</b>    | <b>Sequence(5'→3')</b>  |
|------------------|-------------------------|
| hsa-miR-25-3p    | TTGCACTTGTCTCGGTCTGA    |
| hsa-miR-92a      | TGCACTTGTCCCGGCCTGT     |
| hsa-miR-92b      | GCACTCGTCCCGGCCTCC      |
| hsa-miR-221      | AGCUACAUUGUCUGCUGGGUUUC |
| hsa-miR-371-5p   | AGTGCCCCCACAGTTTGAGT    |
| hsa-miR-1246     | AATGGATTTTTGGAGCAGGAA   |
| hsa-miR-106b     | TAAAGTGCTGACAGTGCAGAT   |
| hsa-miR-93       | CCCAAAGTGCTGTTCGTGC     |
| U6-F             | GGAACGATACAGAGAAGATTAGC |
| U6-R             | TGGAACGCTTCACGAATTTGCG  |
| pri-miR-25-F     | TGTTGAGAGGCGGAGACTTG    |
| pri-miR-25-R     | GCACTGTCAGACCGAGACAA    |
| $\beta$ -actin-F | CATGTACGTTGCTATCCAGGC   |
| $\beta$ -actin-R | CTCCTTAATGTCACGCACGAT   |
